# Supplementary material for: Secondary coiling after incomplete surgical clipping of cerebral aneurysms: a rescue strategy or a treatment option for complex cases? Institutional series and systematic review
Source: Springer Nature journal article supplement (doi:10.1007/s10143-018-0950-4), 2018-02-07
Supplement: MOESM2 [file 15445378]

**Supplementary Table 2.** Outcomes Comparison Between patients harboing aneurysms of the anterior and posterior circulation.

|  | | **Anterior circulation (n=71)** | | **Posterior circulation (n=22)** | | **P value** |
| --- | --- | --- | --- | --- | --- | --- |
| **Raw number** | **Percentage (95% confidence interval)** | **Raw number** | **Percentage (95% confidence interval)** |
| **Subarachnoid hemorrhage** | | 47/63 | 74.6 (62.66-83.72) | 16/18 | 88.89 (67.2-96.9) | 0.69 |
| **Size** | **small** | 26/47 | 55.32 (41.25-68.59) | 7/16 | 43.75 (23.1-66.82) | 0.29 |
| **large** | 19/47 | 40.43 (27.64-54.66) | 9/16 | 56.25 (33.18-76.9) | 0.61 |
| **giant** | 2/47 | 4.26 (1.17-14.25) | 0/16 | 0 (0-19.36) | 1.00 |
| **Percentage of exclusion at first surgery** | **Neck Remnant (Sindou I-II)** | 43/67 | 64.18 (52.22-74.6) | 9/22 | 40.91 (23.26-61.27) | 0.40 |
| **Sac Remnant (Sindou III-IV)** | 16/67 | 23.88 (15.27-35.33) | 10/22 | 45.45 (26.92-65.34) | 0.21 |
| **Regrowth** | 8/67 | 11.94 (6.18-21.83) | 3/22 | 13.64 (4.75-33.33) | 1.00 |
| **Neck reduction > 50%** | | 35/37 | 94.59 (82.3-98.5) | 9/9 | 100 (70.09-100) | 1.00 |
| **Preoperative prediction of incomplete treatment** | | 1/60 | 1.67 (0.29-8.86) | 3/22 | 13.64 (4.75-33.33) | 0.07 |
| **Timing of secondary coiling** | **immediate** | 17/59 | 28.81 (18.84-41.38) | 8/20 | 40 (21.88-61.34) | 0.60 |
| **delayed** | 42/59 | 71.19 (58.62-81.16) | 12/20 | 60 (38.66-78.12) | 0.83 |
| **Secondary treatment** | **Selective coiling** | 68/71 | 95.77 (88.3-98.55) | 20/22 | 90.91 (72.19-97.47) | 1.00 |
| **Stent assisted coiling** | 2/71 | 2.82 (0.78-9.7) | 1/22 | 4.55 (0.81-21.8) | 0.56 |
| **Spontaneous thrombosis** | 1/71 | 1.41 (0.25-7.56) | 1/22 | 4.55 (0.81-21.8) | 0.42 |
| **Angiographic outcome after secondary coiling** | **Raymond-Roy 1** | 46/62 | 67.74 (55.37-78.05) | 13/19 | 68.42 (46.01-84.64) | 1.00 |
| **Raymond-Roy 2** | 12/62 | 19.35 (11.43-30.85) | 6/19 | 31.58 (15.36-53.99) | 0.38 |
| **Raymond-Roy 3** | 4/62 | 6.45 (2.54-15.45) | 0/19 | 0 (0-16.82) | 0.57 |
| **Complication of surgery** | **Transient ischemia** | 2/64 | 3.13 (0.86-10.7) | 0/19 | 0 (0-16.82) | 1.00 |
| **Residual aneurysm rupture** | 12/64 | 18.75 (11.06-29.97) | 6/19 | 31.58 (15.36-53.99) | 0.37 |
| **stroke** | 2/64 | 3.13 (0.86-10.7) | 0/19 | 0 (0-16.82) | 1.00 |
| **Intraoperative rupture** | 0/64 | 0 (0-5.66) | 1/19 | 5.26 (0.94-24.64) | 0.23 |
| **Sleapage of the clip** | 1/64 | 1.56 (0.28-8.33) | 0/19 | 0 (0-16.82) | 1.00 |
| **Complication of secondary coiling** | **perforation** | 1/59 | 1.69 (0.3-9) | 0/15 | 0 (0-20.39) | 1.00 |
| **Clinical outcome (GOS and mRS) at discharge** | **GR (mRS 0-2)** | 33/50 | 66 (52.15-77.56) | 13/19 | 68.42 (46.01-84.64) | 1.00 |
| **MD (mRS 3-4)** | 8/50 | 16 (8.34-28.51) | 1/19 | 5.26 (0.94-24.64) | 0.43 |
| **SD (mRS 5)** | 6/50 | 12 (5.62-23.8) | 1/19 | 5.26 (0.94-24.64) | 0.66 |
| **VS** | 0/50 | 0 (0-7.13) | 0/19 | 0 (0-16.82) | 1.00 |
| **D (mRS 6)** | 3/50 | 6 (2.06-16.22) | 4/19 | 21.05 (8.51-43-33) | 0.18 |
