# Supplementary material for: Secondary coiling after incomplete surgical clipping of cerebral aneurysms: a rescue strategy or a treatment option for complex cases? Institutional series and systematic review
Source: Springer Nature journal article supplement (doi:10.1007/s10143-018-0950-4), 2018-02-07
Supplement: MOESM3 [file 15445378]

**Supplementary Table 3.** Clinical outcome comparison between patients harboing small versus large+giant aneurysms.

|  | | **Small (n=33)** | | **Large+Giant (n=30)** | | **P value** |
| --- | --- | --- | --- | --- | --- | --- |
| **Raw number** | **Percentage (95% confidence interval)** | **Raw number** | **Percentage (95% confidence interval)** |
| **Subarachnoid hemorrhage** | | 25/33 | 75.76 (58.98-87.17) | 21/28 | 75 (56.64-87.32) | 1.00 |
| **Localization** | **ICA paraclinoid** | 3/33 | 9.09 (3.14-23.57) | 8/28 | 28.57 (15.25-47.06) | 0.18 |
| **ICA bifurcation** | 1/33 | 3.03 (0.54-15.32) | 0/28 | 0 (0-12.06) | 1.00 |
| **Basilar artery** | 2/33 | 6.06 (1.68-19.61) | 6/28 | 21.43 (10.21-39.54) | 0.15 |
| **Vertebral artery** | 3/33 | 9.09 (3.14-23.57) | 1/28 | 3.57 (0.63-17.71) | 0.62 |
| **ACoA** | 17/33 | 51.52 (35.22-67.5) | 6/28 | 21.43 (10.21-39.54) | 0.13 |
| **ACA** | 0/33 | 0 (0-10.43) | 1/28 | 3.57 (0.63-17.71) | 0.46 |
| **SHA** | 1/33 | 3.03 (0.54-15.32) | 0/28 | 0 (0-12.06) | 1.00 |
| **PICA** | 2/33 | 6.06 (1.68-19.61) | 2/28 | 7.14 (1.98-22.65) | 1.00 |
| **MCA** | 2/33 | 6.06 (1.68-19.61) | 0/28 | 0 (0-12.06) | 0.49 |
| **Pcom** | 1/33 | 3.03 (0.54-15.32) | 6/28 | 21.43 (10.21-39.54) | 0.10 |
| **A1A2** | 1/33 | 3.03 (0.54-15.32) | 0/28 | 0 (0-12.06) | 1.00 |
| **Acho** | 0/33 | 0 (0-10.43) | 0/28 | 0 (0-12.06) | 1.00 |
| **Exclusion at first surgery** | **Neck Remnant (Sindou I-II)** | 24/33 | 72.73 (55.78-84.93) | 20/30 | 66.67 (48.78-80.77) | 0.84 |
| **Sac Remnant (Sindou III-IV)** | 5/33 | 15.15 (6.65-30.92) | 5/30 | 16.67 (7.34-33.56) | 1.00 |
| **Regrowth** | 4/33 | 12.12 (4.82-27.33) | 5/30 | 16.67 (7.34-33.56) | 0.73 |
| **Neck reduction > 50%** | | 20/22 | 90.91 (72.19-97.47) | 20/20 | 100 (83.89-100) | 1.00 |
| **Preoperative prediction of incomplete treatment** | | 1/32 | 3.13 (0.55-15.74) | 3/29 | 10.34 (3.58-26.39) | 0.35 |
| **Timing of secondary coiling** | **immediate** | 8/32 | 25 (13.25-42.11) | 8/27 | 29.63 (15.85-48.48) | 0.78 |
| **delayed** | 24/32 | 75 (57.89-86.75) | 19/27 | 70.37 (51.52-84.15) | 1.00 |
| **Secondary treatment** | **Selective coiling** | 29/33 | 87.88 (72.67-95.18) | 29/30 | 96.67 (83.33-99.41) | 0.85 |
| **Stent assisted coiling** | 3/33 | 9.09 (3.14-23.57) | 0/30 | 0 (0-11.35) | 0.24 |
| **Spontaneous thrombosis** | 1/33 | 3.03 (0.54-15.32) | 3/30 | 10 (3.46-25.62) | 0.35 |
| **Angiographic outcome after secondary coiling** | **Raymond-Roy 1** | 27/33 | 81.82 (65.61-91.39) | 24/30 | 80 (62.69-90.49) | 1.00 |
| **Raymond-Roy 2** | 4/33 | 12.12 (4.82-27.33) | 5/30 | 16.67 (7.34-33.56) | 0.73 |
| **Raymond-Roy 3** | 2/33 | 6.06 (1.68-19.61) | 1/30 | 3.33 (0.59-16.67) | 1.00 |
| **Complication of surgery** | **Transient ischemia** | 0/33 | 0 (0-10.43) | 1/28 | 3.57 (0.63-17.71) | 0.46 |
| **Residual aneurysm rupture** | 5/33 | 15.15 (6.65-30.92) | 6/28 | 21.43 (10.21-39.54) | 0.74 |
| **stroke** | 1/33 | 3.03 (0.54-15.32) | 0/28 | 0 (0-12.06) | 1.00 |
| **Intraoperative rupture** | 0/33 | 0 (0-10.43) | 1/28 | 3.57 (0.63-17.71) | 0.46 |
| **Sleapage of the clip** | 0/33 | 0 (0-10.43) | 1/28 | 3.57 (0.63-17.71) | 0.46 |
| **Complication of secondary coiling** | **perforation** | 1/33 | 3.03 (0.54-15.32) | 0/28 | 0 (0-12.06) | 1.00 |
| **Clinical outcome (GOS and mRS) at discharge** | **GR (mRS 0-2)** | 18/26 | 69.23 (50.01-83.5) | 15/24 | 62.5 (42.71-78.84) | 1.00 |
| **MD (mRS 3-4)** | 2/26 | 7.69 (2.14-24.14) | 4/24 | 16.67 (6.68-35.85) | 0.66 |
| **SD (mRS 5)** | 2/26 | 7.69 (2.14-24.14) | 2/24 | 8.33 (2.32-25.85) | 1.00 |
| **VS** | 0/26 | 0 (0-12.87) | 0/24 | 0 (0-13.8) | 1.00 |
| **D (mRS 6)** | 4/26 | 15.38 (6.15-33.53) | 3/24 | 12.5 (4.34-31) | 1.00 |
